# Supplementary material for: High gas sensing performance of inorganic and organic molecule sensing devices based on the BC3N2 monolayer
Source: Royal Society of Chemistry journal article supplement (doi:10.1039/d2cp01882a), 2022-01-01
Supplement: d2cp01882a1.pdf [file d2cp01882a1.pdf]

## Organic and inorganic Gas Sensing Performance of BC<sub>3</sub>N<sub>2</sub> monolayer: a first-principles study

Guogang Liu<sup>1</sup>, Tong Chen<sup>2\*</sup>, Xiansheng Dong<sup>2</sup>, Lin Huang<sup>2</sup>, Zhonghui Xu<sup>1</sup>, Xianbo Xiao<sup>3\*</sup>

<sup>1</sup> School of Software Engineering, Jiangxi University of Science and Technology, Nanchang 330013, China.

<sup>2</sup> School of Energy and Mechanical Engineering, Energy materials computing center, Jiangxi University of Science and Technology, Nanchang 330013, China.

<sup>3</sup> School of Computer Science, Jiangxi University of Traditional Chinese Medicine, Nanchang 330004, China

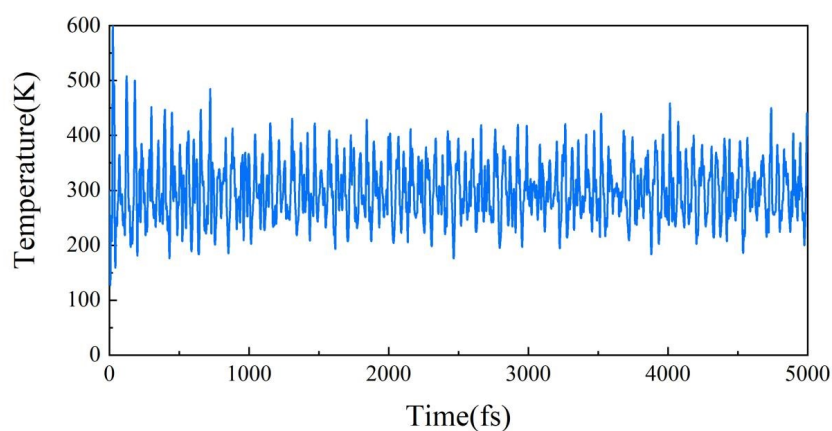

Fig. S1: The molecular dynamics simulation of 2D BC<sub>3</sub>N<sub>2</sub> monolayer.

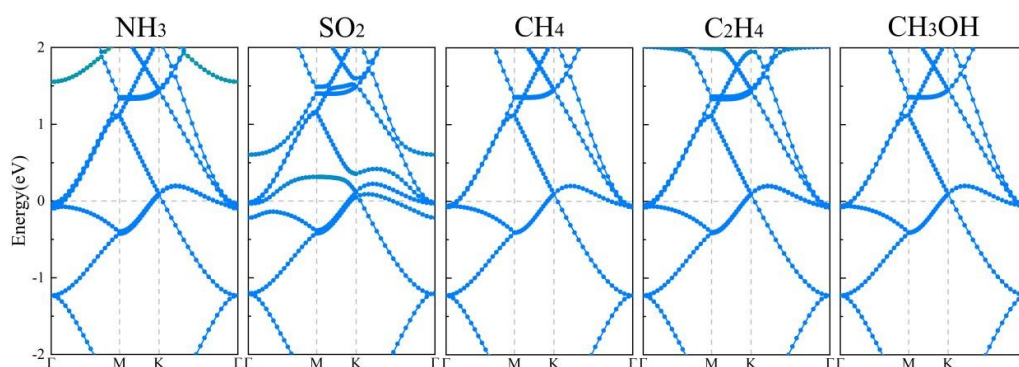

Fig. S2: The band structures of physical adsorption molecules of NH<sub>3</sub> (a), SO<sub>2</sub> (b), CH<sub>4</sub> (c), C<sub>2</sub>H<sub>4</sub> (d) and CH<sub>3</sub>OH (e) on BC<sub>3</sub>N<sub>2</sub> monolayer.

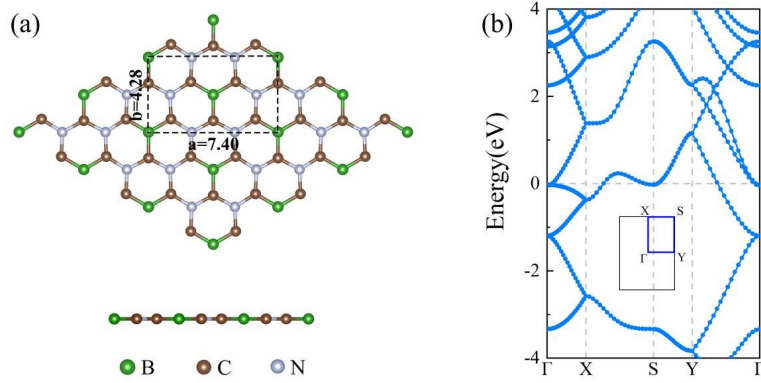

Fig. S3: The rectangled supercell of BC<sub>3</sub>N<sub>2</sub> monolayer outlined with black dashed lines (a) and its corresponding electronic band structure (b).

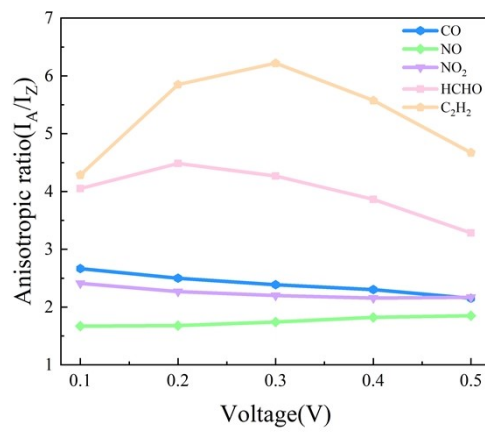

Fig. S4: The anisotropic ratio of the sensitivity of CO, NO, NO<sub>2</sub>, HCHO and C<sub>2</sub>H<sub>2</sub> along the A direction to that along the Z direction ( $I_A/I_Z$ )

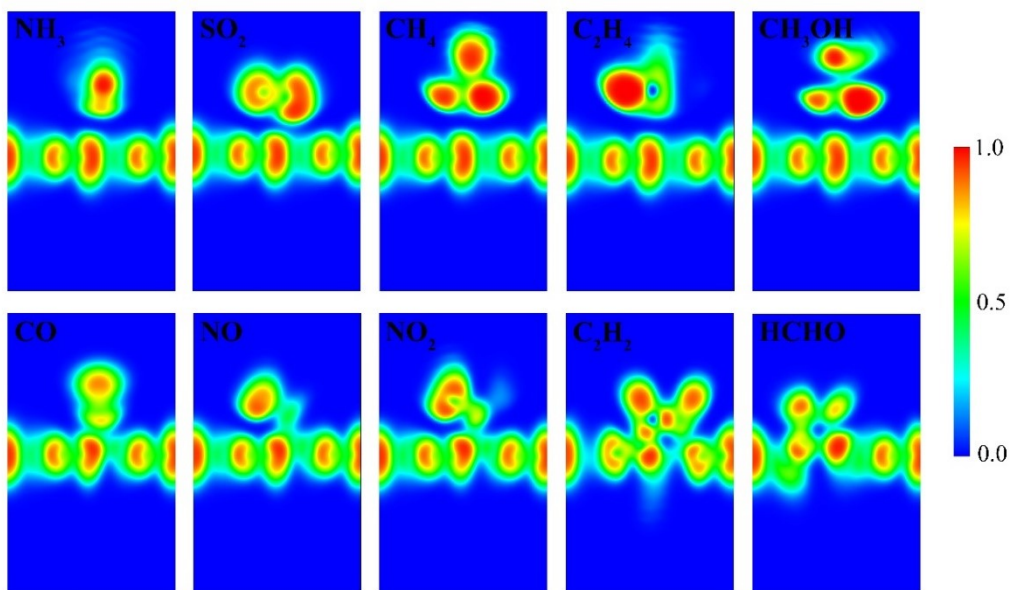

Fig. S5: The ELF maps for gas molecules adsorbed on BC<sub>3</sub>N<sub>2</sub> monolayer.
